# Supplementary material
Source: PubMed Central journal article supplement (PMC4352976)
Supplement: supp_dev.118844_DEV118844supp.pdf [file supp_dev.118844_DEV118844supp.pdf]

## Supplementary methods

### Generation of 40D4 mutant

A *minus* fusion-defective mutant (40D4) was generated by insertional mutagenesis of *Chlamydomonas* strain B215 with plasmid pMN56 (Nelson et al., 1994) encoding the nitrate reductase gene. After screening ~ 4000 insertional mutants, clone 40D4 was identified with fusion defective phenotype. 40D4 underwent flagellar adhesion with wild type *plus* gametes and also formed pairs of gametes adhering at their apical ends, but failed to fuse, which is identical to the phenotype of the *hap2* mutant 63B10 (Liu, 2008). As expected, 40D4 was rescued for fusion by transformation with the wild-type HAP2 gene (Fig. 3 in main text). Diagnostic PCR confirmed that the HAP2 gene was disrupted in 40D4 (Fig. S1). The following primers were used:

P2, 5'-CTGGCTGGTGACAGGCAGCGCGAA-3';

P3, 5'-CAGCCAGGGATTCTGCTGCGAGT-3';

P15, 5'-ACTGAGTCGTACAGGCTGACTGTGC-3';

P22, 5'-CGTTGCAGCCACATGCGCTCCACACA-3';

P26, 5'-ATCGCGGACGGCCGGGTGC-3';

P61, 5'-CCCAGCTGGTCGTCAAGCCCTCCGG-3'.

As shown in Figure S1, the HAP2 gene was disrupted near the 3' end in the coding region in 40D4 as documented with primers (P61-P22). Control PCR analysis using the parent strain B215 is also shown. Sequencing confirmed the identity of the PCR products.

### pHAP2-HAm plasmid

pHAP2-HAm plasmid sequence: lower case, cloning vector PUC19; upper case, HAP2 gene sequence; boxed, *Bgl*II or *Nru*I site; green, HAP2 coding sequence; red, the first intron; purple, 3HA tag. Note that the HAP2 cDNA encoded by this plasmid contains a Q at residue 697 (rather than L697 in cDNA GI:288563867), which corresponds to the Q at that site encoded in HAP2 gene model Cre01.g066100.

```
>tcgcgcttccggtgatgacgggtgaaacctctgacacatgacgtcccggagacggtcacagctgtctgtaagcggatccggg
agcagacaagccccagggcgcgctcagcgggtgttggcgggtgctggggctggcttaactatcgggcatcagagcagattgtactg
agagtgcacatattcggtgtgaaataccgcacagatgcgtaaggagaaaataccgcatcagcgcattcgccattcaggtcgcg
aactgttgggaagggcgatcgggtcgggcctcttcgctattaccagctggcgaaaggggatgtgctgcaaggcgattaagttgg
gtaacgccagggtttccagtcacgacgttgaaaacgacggccagtgaattcagctcTGAAAGGGCAGGGTGTG
CCCTGGTGTGCAGGTTGAAGGGCGGAGGGAGACGACGAGATTGGCCAACCGCCA
AACCGACTGCGGTGTTTGTGAGGAGCGCAGATTGGCTCGTGGATGCAGCTGAGT
GATATTTTATCCTTTTTGAGCTTCTGCAGCAAGTGCCAGCTCGAATGCAGCGCTCG
CTGGTTGTTTCGGCCTTGAAGCGCCACTTTCGCCCGCAGGCATGGTTTTTGCTAACT
TGCACCTCAGCTGGCGTTCTGATACATCACTTTATAATCCGCAGCTTACACTGCTG
GCTTGGAGGCCCTGTGCACAACCTCGGCACCACGCAACTGACCTCACAGTGGCAAT
CTAAATCCGATAATGCCTGAACACAATTCCAGTGCCTACTTCAGGTCTAAATAAC
TTATCACAGGTCTAGTCAGCGAAACCAGGACACTGATGTGTCGTGCCATCGCGGT
TGCGCTGATAGTTTACCTAGCCAGCATTATATTCTTGCGCACGCTGAGGTCATTG
CAAGTGGGCGCTTGGAAAAATGCGTCGTCGATGGTGTGTTAGATCTACCGAGGTGA
GAATAGAAGTCCTGCGGTCGACGTTGGCTTGGCATTTCCTGCTCATCTGGACACC
GAGACGTGAAAATCATGATATTTACACAACCTTCAGGAGCTGGACTGCCAGGAG
AAGGTGGTGGTGCAGCTGACGGTCGGAAATGGGCAGAGCCTGCAGACCGAGGCT
CTGGAATTCTCGCTCAGCTGCCTCAACAGCCCCGACGGACGCTGCCCTGCAGCT
GCAGCGCCGCCACCCTACTTGCGCATGTCGTGACCTGGCGGCGCCGCTGCGCGT
GTCGCTTACCAAGTCGCCGCTGTGGGCCTCCTACCCGCTGCAGTACTTGTGCTCCT
TAACTGGAACCCCTGGAAGTCATCCTGCGCCCCAGCAACAAAGTTTGCAAGGA
CGGCGACTGGGAGGACTCGCCACGTGTGGCTGGTTCAGCCAGGGCGGTGTGCG
GGTGGCGGACAGCCAGGGATTCTGTGCGAGTGCAGCAGCAGCCAGGTGTGGGA
CGACACCTTCGGGTCCAGCAAGGAGCGCACTCGCGCCAACCTGGACTGTGACTTC
TGGAGCGACCCACTGGACATACTGATTGGCCGCAAGCCGGTGTCCGCACACTGCC
TCACATTCGACCCGCAGTGGTACAGCGGCTATGAGCTGGGCGCCGCTCGCTGCA
```

GTTCGAGATCGCCATCACCGTGGAGGTACCCACCGCCCCCTCCCCACCCACAGCC  
ACCACCTCCGCCACTCCCCGCACCAACAACAGCAGTAGCGCCAACAGCACCAAC  
AGCACCAACAGCCCCGGCGCCGCAGTTTCTGTCCCCGCCTGCGCCCAGCACGCGGG  
AAGTGTTCATCTGGGTCCCTCGGTGCCTCTGGCCAGCAGCGCGAGCCGCTGCT  
GTCCGCCAAGCTGCTGGGCGACCTGGCCATGTACACACAGCTGCCCCGAATCAGC  
AACCAGGTGCTGATGGTGCCGCAGCCGCCAGCCGCCGCCGCCGCCACCGGCTCG  
CCCCTGGACGCCACCCTGGCGACCAACCGCTCCGCTGGATGCTGCTGGACAAGA  
CCATGCTCAGCATGGACGGCCTGGCCTGCGACAAGGTGGGGACCGGCTTCTCAGC  
CTTCCGCTACCAGCCCAGCGGCTGCGGCCGTGCCCTCAGGCCTGTCTGTCCGGC  
CAGCTCAAGGACCTGTGGGAGGGCGGACCTGGCGCGTATCGCGGACGGCCGGTG  
CCGCTGTACATGATCACAGGTTCACTGGCGGCAGCGACACCACGCTGCAGTCTT  
TCTCCGGGGGCCCGCTGTCTGTTCCGCGCTGCCTGTCACCAGCCACAGCCAGAGCCT  
GGTGACGCTGAGTGTGGCGGCGGACGGCGTGAGGCTGGTCACCAACCGCAGCCC  
GGGCAAGATTACAGGCGCGGCGGTGTGCCGTTTCGCCGGCACTTCTGTGGCGGC  
TTTGAGGCGGTGGCAGCTCGCGGCTACATCTACGTCAACATCACCAACACCGGCC  
GCCTGGACAGTGACTACACACTCACAGTGTCCAACGTCTCGTCCAACGTGCGGCC  
CATCGAGGCGCGCACACTGGCCGTACGCGCGGGATCCGCCGCCAGCCTGGATCC  
GCCCATGGAGCTGTACGTGGAGGACCAGGCGGCAGCGGCGGCGCGCACGTGCAC  
AGTCAGCCTGTACGACTCAGTCGGCGCGGTGACGGACTCGCTCAGCTGTCTTC  
TACACAAACGCCACCCAGCTGGTTCGTCAAGCCCTCCGGCGGGTACAACGGCACG  
GGGGACGGCGCGGGCGTAAAGCGCAACGGCACCGATTGCAGCACGGCCTGCACC  
AACCCGATTGACGTGCTGTGCTTCGTGACCAAGAAGTGTGGTCCAAGTTCGGGC  
GGCTTCTGGGCATCATCGGCGGCGCCCTGGTGGGGCTGGGGCTGCTGGCAGTAGC  
ACTCAAGTTCGGGTGGCTGGCCTCCCTGGCGGCCTCGTGTGTGGGGGAGGAGGA  
GGAGCAGCAGCAGGCGGGGCTGGAGGCGGCATGGGGCTGGGGACCGGCGCGG  
CGGAGGCTGTTTTGGAGGCGGGCAGCAGCAGCAGCAGCAGCAGCCGCTGCTGCTAG  
CACCCGGGGAGGCTGTCGCGAATACCCCTACGACGTGCCCGACTACGCCTACCCC  
TACGACGTGCCCGACTACGCCGATCGATCCGGACCGTACCCCTACGACGTGCCCG  
ACTACGCCGCTAGCAGTACTCGCCGGCCCCCGGGAGCTAGCCATGCCATGTCGCC  
ACCGCAGCAGCAGCAGCGCTCGCATGCGGAGGTGGCAGCAGGGGCTGCAGTGGC  
AGGAGCAGGAGCCCGCGGTGCAGCAGCGGCGGTGCTGGGAGCCAAGCATGGCG  
GCGGCGGCGGCGGCGCTCGTGGCAAGCAGCAGCATGCCGACACCCGGCACTTGC  
AGGACCGCACTCACGGGCCATCGACGGCGGAGCAAGCATTGGCAGCAGCAGCG  
CCGGCGGAGTAGCAGCCTAAGCAGCTACAGCCAGCCTCGTGAGGCGGGAGGCA  
GGCTGCTACAGCCCGGCGAGCAGTGTGTTGTGCCTGAAGGCGGCGGCGGCG  
GCGTGCCTGCGACGAAGGTGCAAGGGCACAAAGCAGCGATTGGGATGCTAGAG  
GGCGCTCTCTCGTTCGCAGATGAGCACGGCAGCCCTCGACAGCGGTACGACG  
GGGTACGGCAATCGCCGTATATGGTTTTCGGCAAAATCCGTACGACGGCTGGTATGA  
TGGCGGCAAGTGGTGGCGGTGGTGGTGGCGGCGGCGGTTATGGGCGTGAGGC  
GCCGCCCGCAGGGGCCACCGCCGATCCGGTAGGGGCACCGCCGCCCGCCGCC  
GCGGCGGCGGAGCCTGTGGGAGCGCATGTGGCTGCAACGTCCGGGCGGCGGCGG  
CGGCGGCGGTGGCGGCGGTGGCGGCGGCGGTGGCGGCGGCAGTGGTGGCGGCGT  
CGATCAACATGGTGGTTCGAGTTGCGCAGATGCCGCAAGGCGGGGAGGGGGAGG  
CCCAGGCGGCATGCGTGGAGTGGAGGGACTTATGAGTAACGGAGGCCGACCCAA  
CGGGCCACACCCACACGCCCGCCTCCGCCACCTCCGCCACAGCAACAGCAGCA  
GCAGCAGCGCCAGCGGAGGAGCTTCTGGAGTCACTCACAGCCATGATGACT  
GCCTTGGGGGGCGGTCGTGAGGAGGAGGCCGGTGGTGACCGGCGCGGTGGGG  
CAGGGGTGGAGCGGCGGCGGCACGGGGCCGCGGCGCAGGAGGCGGCAGGG  
GCCACCCGCTTCGATAGGCTCCCCGCCCGGGGCCGTTGACGCCGCTGAGTA  
TGGGCCGACAGGAGGCCAAGCGCGGCGGTGGGGGGCAGGCGGCGGGCGCGGAG  
GAGTTGGCGGCGACGGCGGCGGGGGCGGGTTCGGCGCGGCTGCGTACGTGCAGC  
TGTCTACCGGCGGGCGGCGGGGGCGGTGGAGGGGGGCGAGGACGTGGCGGC  
GGGCGTGAGGGCCCCACGTGGCACAACCCGGTGTACGACTGGCAGGCGCCGCC  
AAGTAGCCAACGAGGTGGCGGTGTGGAGCGTGTGAGCTGTGAAGCGGGGTGT  
GGAGCTGTGAGCATGTGGGCTGTGTCTGCCATGTGCAACGAAACCCCTCGCCAA

AGTGCCCATATGTGAATGGCTGTGCGCCTGAGCAGCTGTACGGATACGTTCTTTG  
GTTTAGCTGATATGTAGCCGCCGCGATGGCGGTGCAAGTGGATGTAAGGCGCAA  
GGGCTCGTGCATTTTCATGTGGCGCACTACTGTGCAGTTTTCTGGTGTGAAGCAG  
CTTACATCGAACTCTTTATGCGTGGCGTGATTTCGTGAGCATGAATGGTGGGTCT  
CTGCCTCTTATGCTACTGGCTTCGTATGCCCTGCATGAGCGCAAGCTTTGGCTGG  
GATTGGCTTCGTACATGTGCTTGTTCCTAACAGACGCGCATGACCGTGACCAAGA  
GGCAAGGATAAGGCGGTTGTCATTGCGTTACACTTGCACACATGTCACTGTGACA  
TAGACGGAACACCATTTCAAAATGCACTGACTGCTTCGGAATTCCTGAATTTAAA  
CGTTCCATCTGCCATGAATTGCCGTCACAAATCCATTTGGCCGAGCATCTACATTA  
TGCATGCAAAGAGCCCCTCGGTACACGTTAATGTTGTCTTTCCAGTCCAGGCGTC  
GAAACAACGTGCACACACCGCAGCAAAACCTCCGCAGCGGTCACGTGGAGTCGC  
CTTACGCACGTATGTACATCCGATTGAGGTTACGCGCTTCAATATCTGCCACTTT  
GTCACATCCGGGGTAAGCTTCCGGATGCTGCGCCGACAGATGCCATTATGCGGGC  
CAGCCCAACCACTTCGCAACCCGCAACCGCAACATGCTCACCGCTCCTCTCCTAC  
CTGTCTCATCCCCACTCTCCGCCGGCGCTGCCCCAGCTGAACGCTGCCGCTGCTG  
TTGCAGCGCCACCGCGCCCGAGTGCCTGTGGAGGGCTGCTCGCGGGCGGGGTC  
GCGGGCGCCCGCCCTTGACCTTCTGCTTGGTGCGCCCCAGGCCCAATCCTCATCG  
CTGCCGTCGCCATCCTCGCCACCTTGGTCTCACCGTCTTGGCCCTGCCGCCCGCC  
ACTGATGCTGAGCTTAAGCCTGGCTAGGTCCGCTGCAACACCGCCTGCTGCTGCA  
CCCTCCTCCGAACCAGAGCCCGCCGCCACCACAGTCGCCGCCGCCGCCGCTCCT  
TCTTCTGCTTCGCAACGCCCGCCGCTCCGCCCTGCTGCTGCTACTGCTGCCGCCG  
CCAGTTGCTACAGCCGCCGCTCCAGCTACAGCTCGTCTCCACGGGTTGTCTGTG  
CGGCCGCTGCAGCTGCCCGTCTGGTAGTCGCGGAAAGCCTGAGGCGGGGGCGG  
GGCGGGATGGGGAGGGGGCCGGCGGTGTCAGCGTCAGAGCCCGTGTATCGGTAC  
CCGCACGCGCCTTGGCACGAGAGGACGAGACCGGCCCGACCCCTCCTCACTGTC  
ACTTGCTCCCGCGGCCCGCCCGCCCGCCCTGCTACAGCTGCCGGGGTGAGTG  
CTGCTACTGCCAGCGGTGGTGGTGTGCTACTGCGGCCCTTGATGTGGTGACTTT  
GCTACGCGACATGAGCTTCCCGTCTGGTAATCTTTTCATCGCCTGCCGTTACACA  
GTTTGCCTACTAGTTAAGGCGCCACGATTTGTATCGCTCCACACATGGCCAGGCCG  
GTGCTGGCCTCAGACAGCCCATGACCATCCCGCTCCCGGGAGCTCggtaccgggga  
tcctctagagtcacctgcaggcatgcaagctggcgtaatacatggtcatagctgtttcctgtgtaaatgttatccgctcacaattccaca  
caacatacagagccggaagcataaaagttaaagcctgggggtgcctaataagtgagtaactacattaatgctgtgcctactgccc  
ctttccagtcgggaaacctgctgcccagctgcattaatgaatggcaacgcgcccgggagagggggttgcgtattggcgctcttcc  
gcttctcgtcactgactgctgctgctggctgctggctgctggcgcgagcggatcagctactcaaggcggtaatacggttaccac  
agaatcaggggataacgcaggaaagaacatgtgagcaaaagccagcaaaagccaggaaaccgtaaaaaggccgctgctggc  
gftttccatagctccgccccctgacgagcatcacaataacgacgctcaagtcagaggtggcgaacccgacaggaactataaaga  
taccaggcgtttccccctggaagctcccctgctgctctcctgttccgacctgcccctaccggataactgtcccctttccctcgg  
gaagcgtggcgtttctcaatgctcacgctgtaggtatctcagttcggctgtaggtcgttcctcaagctggcgtgtgacagacccc  
ccgttcagcccaccgctgccccttatccgtaactatcgtttgagccaacccggaagacacgactatcggcactgagcagcagcc  
actgtaacaggattagcagagcaggtatgtagcggtgctacagagttctgaagtggccttaactacggctacactagaagga  
cagtattggtatctgctctgtgtaagccagttacctggaaaaagagttgtagctctgatccgcaaaaaccaccgctggtga  
gcggtggtttttgttgaagcagcagattacgcgcaaaaaaaggatctcaagaagatccttgatcttttacggggtctgacgct  
cagtggaacgaaaactcacgtaagggatttggtcatgagattcaaaaaggatctcacctagatcctttaaaataaaatgaagttt  
aaatcaatctaaagtatatagtaaaactggtctgacagttaccaatgcttaactagtgagcactatctcagcgtatctgctatttcgt  
catcatagttgctgactccccctgctgtagataactacgataccggagggttaccatctggcccagtgctgcaatgataccgca  
gccccacgctcaccgctccagattatcagcaataaaccagcagccgggaaggggcagcgcagaagtggctcgtgcaactttacc  
gcctccatccagcttataattgttccgggaagctagagtaagtagttgccagttaatagtttgcgaacgttgttgcattgtacagg  
catcgtggtgacgctcgtgttggtagcttcattcagctccggttccaacgatcaagcgcagttacatgatccccatgtgtgca  
aaaaagcggtagctccttcggtctccgatcgttgcagaagtaagttggccgaggttatcactcatggttatggcagcactgcataa  
ttctctactgcatccatccgtaagatcctttctgactggtgagtagtcaaccaagctctctgagaatagtgatcgccgaccgag  
ttgctctggcggcgtcaatacgggataataccgcccacatagcagaactttaaagtgctcatcattgaaaacgttcttcggggcg  
aaaactcgaagatcttaccgctgtgagatccagttcgatgaaccactcgtgcaaccaactgatctcagcatctttactttaccag  
cgtttctgggtgagcaaaaacaggaagcaaaaacccgcaaaaaagggaataaggcgacacggaaatgttgaatactacatactctt  
ctttcaatattattgaagcattatcagggttattgctcatgagcggatacatattgaatgtatttagaaaaataaacaatagggttcc

```
g'gcacattccccgaaaagtgcacctgacgtctaagaaaccattattatcatgacattaacctataaaaataggcgtatcacgaggcc  
cttcgtc>
```

**Immunofluorescence image stacks for *hap2*, *HAP2-HA* and *HAP2-760* gametes**

*hap2*, *HAP2-HA* and *HAP2-760* gametes were stained with anti-HA for immunofluorescence analysis. The serial Z-section image stacks were taken from the top to bottom of the cells using fluorescent microscopy and Micro-Manager-1.4 software. The stacks were saved using ImageJ software (NIH).

**Table S1. Predicted palmitoylation sites in *Chlamydomonas* HAP2 from online server (<http://csspalm.biocuckoo.org/online.php>). Low threshold was used for the prediction (Veit, 2012).**

| Site | Peptide         | Score  |
|------|-----------------|--------|
| 2    | *****MCRAIAVAL  | 42.224 |
| 71   | ALEFSLSCLNSPDGR | 10.84  |
| 136  | LRPSNKVCKDGDWED | 4.397  |
| 164  | VADSQGFCECSSLQ  | 4.397  |
| 661  | LASLAASCCGGGGGA | 9.477  |

Figure

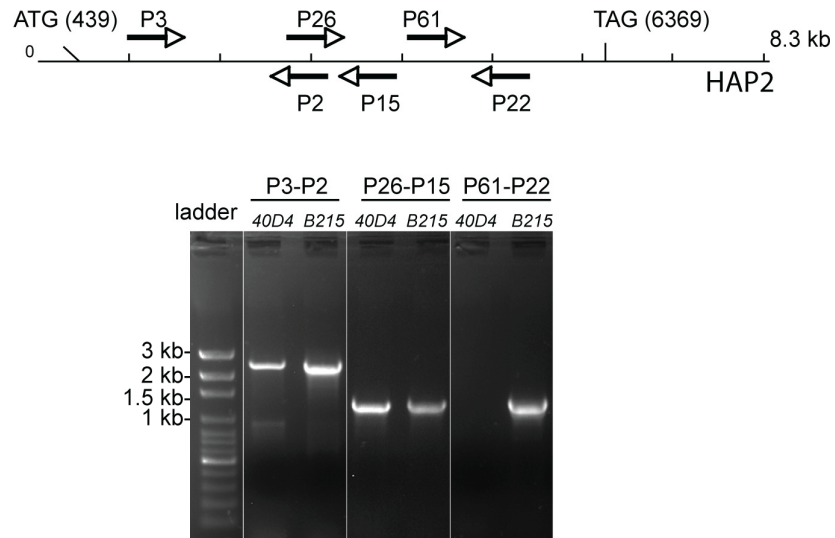

**Fig. S1.** Diagram and DNA gel image show diagnostic PCR results using *B215* and *40D4* genomic DNA as template. The location of primers is shown in the diagram of the *HAP2* gene. The PCR amplifications from primer sets P3-P2 and P26-P15 are positive in both *B215* and *40D4*. There is no PCR product when using primer P61-P22 in *40D4* indicating that the *HAP2* gene is disrupted at the 3' end.

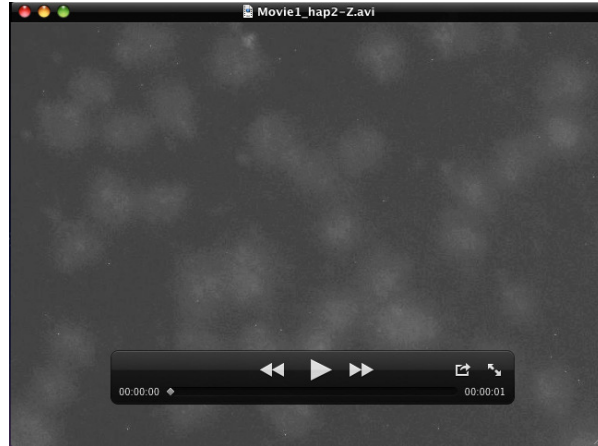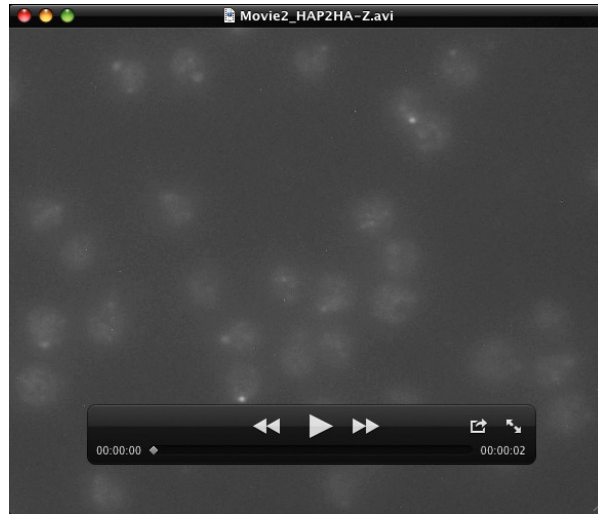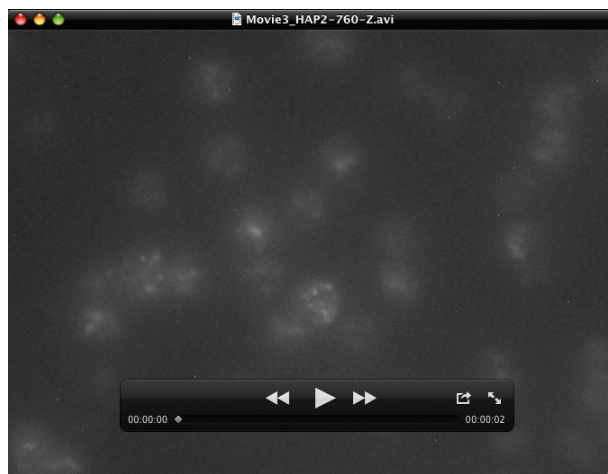

**Movies 1-3.** Movie 1 (*hap2-Z.avi*), Movie 2 (*HAP2HA-Z.avi*) and Movie 3 (*HAP2-760-Z.avi*) are anti-HA immunofluorescence image stacks of *hap2*, *HAP2-HA* and *HAP2-760* gametes, respectively.

**Supplementary Reference:**

Nelson JA, Saveriede PB, Lefebvre PA. (1994). The CRY1 gene in *Chlamydomonas reinhardtii*: structure and use as a dominant selectable marker for nuclear transformation. *Mol Cell Biol.* 14(6):4011-9.
